# Supplementary material for: Tristetraprolin is a novel regulator of BDNF
Source: PubMed Central journal article supplement (PMC4164675; doi:10.1186/2193-1801-3-502), 2014-09-06

Kumar et al. Supplementary Table 1

List of cloning and Q-PCR primers

| Primers for cloning                                     | Forward Primer                                      | Reverse primer                                |
|---------------------------------------------------------|-----------------------------------------------------|-----------------------------------------------|
| <i>BDNF long 3' UTR-XbaI</i>                            | 5'-TATTCTAGA AACTGACCATTA AAAAGGGGA<br>AGATAGTGG-3' | 5'-AAATCTAGATTACAATAGGCTTCTGAT<br>GTGG-3'     |
| <i>BDNF short 3' UTR-XbaI</i>                           | 5'-<br>GCATCTAGATGGATTTATGTTGTATAGATTATAT-<br>3'    | 5'-<br>CAGTCTAGAATCTGTTTTCTGAAAGAGGGAC-<br>3' |
| <i>U1 fragment-XbaI</i>                                 | 5'-<br>GCATCTAGATGGATTTATGTTGTATAGATTATAT-<br>3'    | 5'-AAATCTAGAGGTCATGGATATGTCCAA<br>TAAAT-3'    |
| <i>U2 fragment-XbaI</i>                                 | 5'-CGC TCT AGA GGA AAC AGT CAT TTG CGC<br>A-3'      | 5'-<br>CAGTCTAGAATCTGTTTTCTGAAAGAGGGAC-<br>3' |
| <i>TNF ARE-XbaI</i>                                     | 5'-TTTTCTAGAAGCCTTCCTCACAGAGCCAG-3'                 | 5'-CCCTCTAGAGAAGACAGCTTCCCACAC<br>TG-3'       |
|                                                         |                                                     |                                               |
| Primers for Q-PCR                                       | Forward Primer                                      | Reverse primer                                |
| <i>Mus musculus ZFP36/TTP</i>                           | 5'-TCTCTTACCAAGGCCATTC-3'                           | 5'-ATCGACTGGAGGCTCTCG-3'                      |
| <i>Mus musculus ZFP36L1/BRF1</i>                        | 5'-GCACAAGCACAACTTTCCGT-3'                          | 5'-AATTGCAAGCGTGGAGGTTG-3'                    |
| <i>Mus musculus ZFP36L2/BRF2</i>                        | 5'-GCACAAGCACAACTTTCCGT-3'                          | 5'-AATTGCAAGCGTGGAGGTTG-3'                    |
| <i>Mus musculus actin, beta</i>                         | 5'-CCAGTTCGCCATGGATGAC-3'                           | 5'-GAGCCGTTGTGACGACC-3'                       |
| <i>Mus musculus BDNF (CDS, transcript variants 1-4)</i> | 5'-TACCTGGATGCCGCAAACAT-3'                          | 5'-GCTGTGACCCACTCGCTAAT-3'                    |

a.

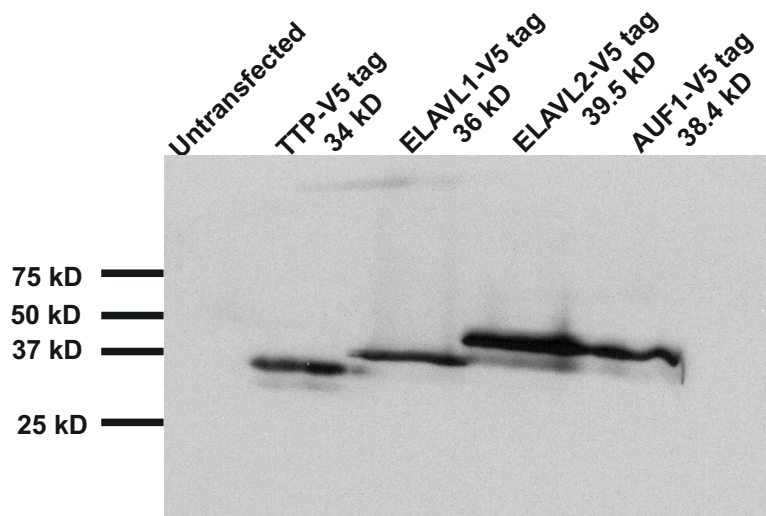

b.

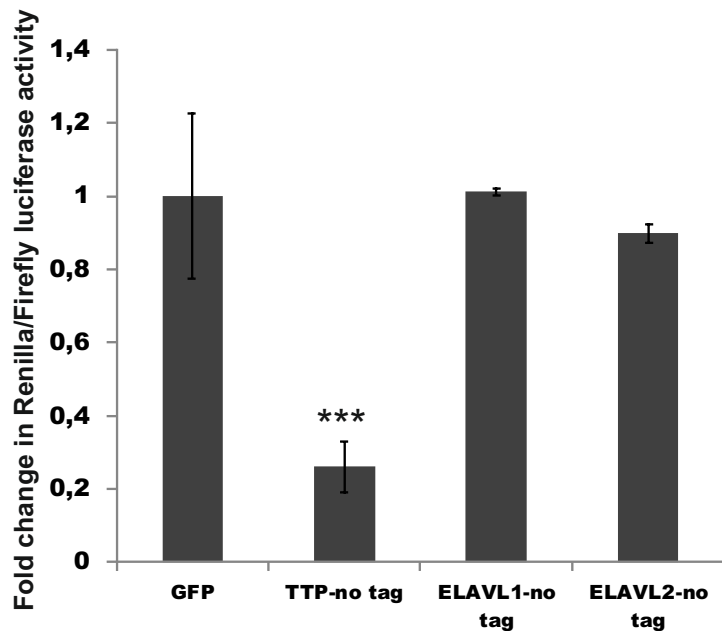



Kumar et al. Supplementary Table 2

BDNF is co-expressed with ARE-BP-s in various tissues with known BDNF function.

| mRNA   | Brain* | Skeletal muscle | Heart** | Monocytes |
|--------|--------|-----------------|---------|-----------|
| BDNF   | Yes    | Yes             | Yes     | Yes       |
| TTP    | Yes    | Yes             | Yes     | Yes       |
| BRF1   | Yes    | Yes             | Yes     | Yes       |
| BRF2   | Yes    | Yes             | Yes     | Yes       |
| ELAVL1 | Yes    | Yes             | Yes     | Yes       |
| ELAVL2 | Yes    | Yes             | Yes     | Yes       |
| AUF1   | Yes    | Yes             | Yes     | Yes       |

\* BDNF is co-expressed with TTP, BRF1, BRF2, ELAVL1, ELAVL2 and AUF1 in prefrontal cortex, cingulate cortex, parietal lobe, temporal lobe, occipital lobe, ciliary ganglion, cerebellar peduncles, globus pallidus, olfactory bulb, thalamus, hypothalamus, subthalamic nucleus, caudate nucleus, amygdala, pons

\*\* BDNF is co-expressed with TTP, BRF1, BRF2, ELAVL1, ELAVL2 and AUF1 in heart and in primary human cardiac myocytes

SOURCE: [www.Genecards.org](http://www.Genecards.org)

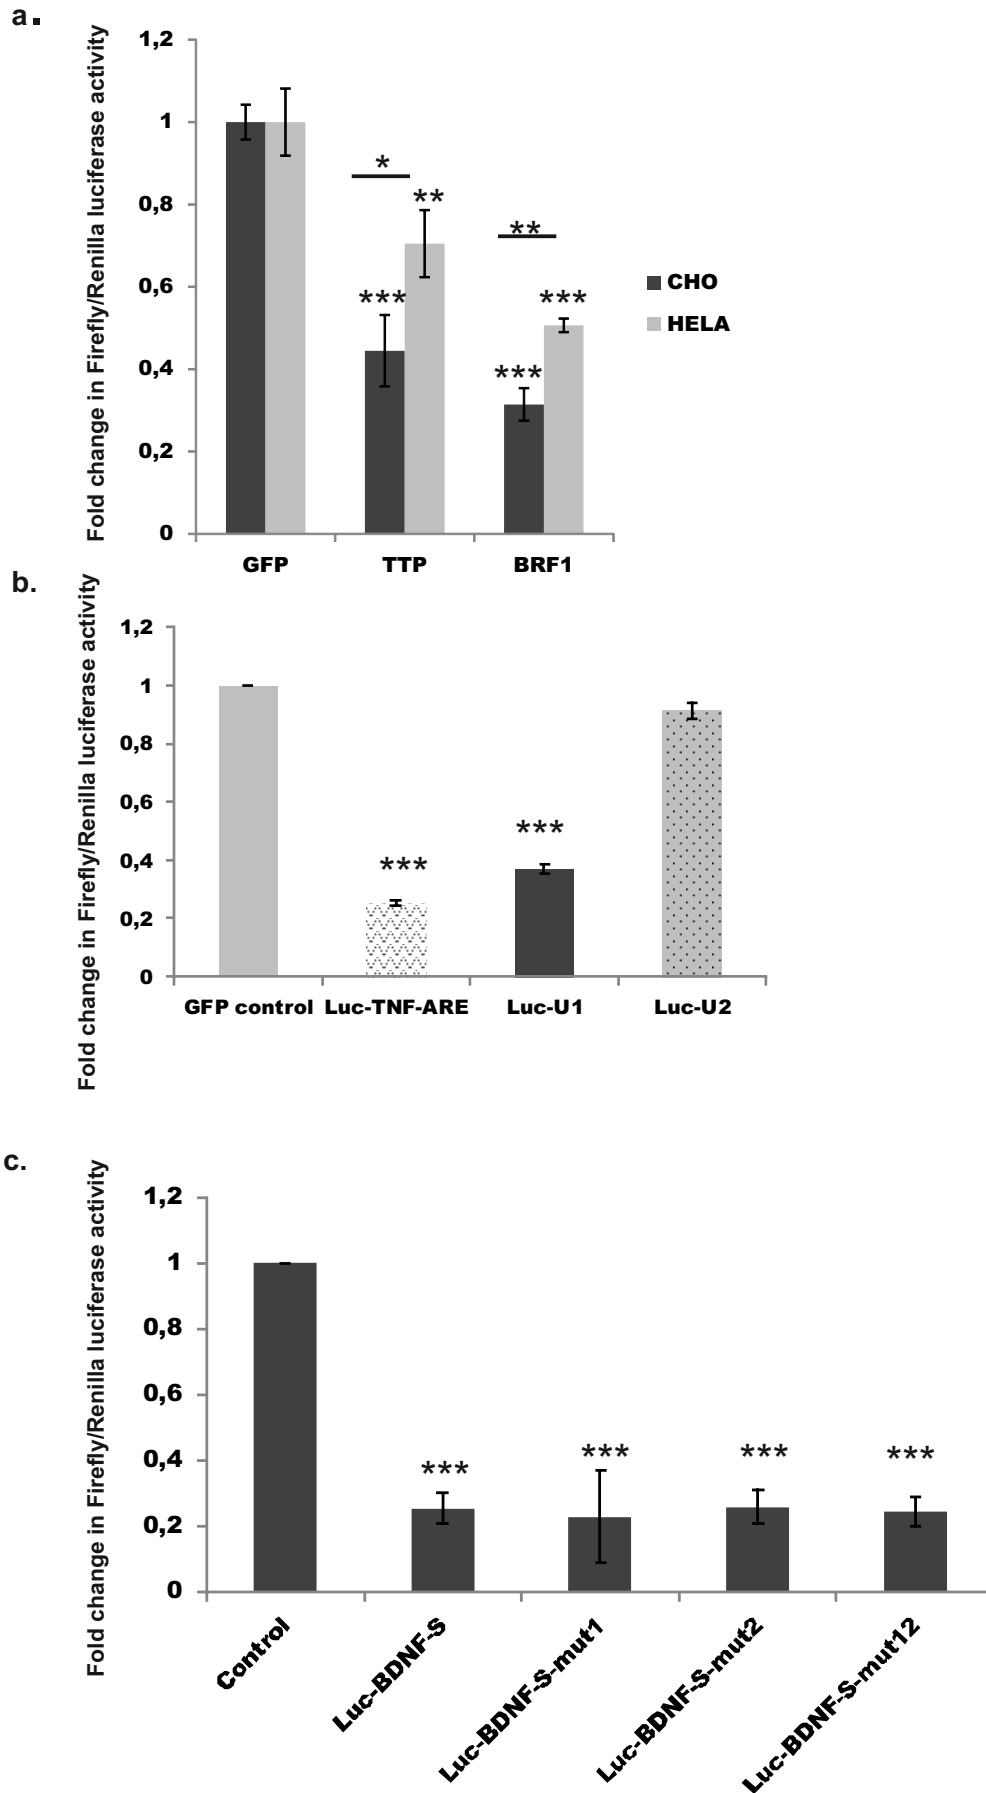

# Kumar et. al. Supplementary Figure 4

## U1

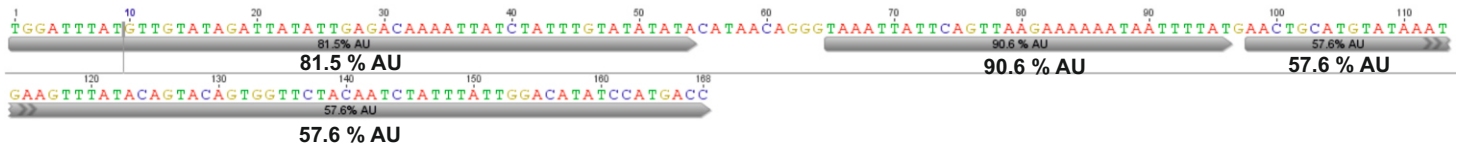

## U2

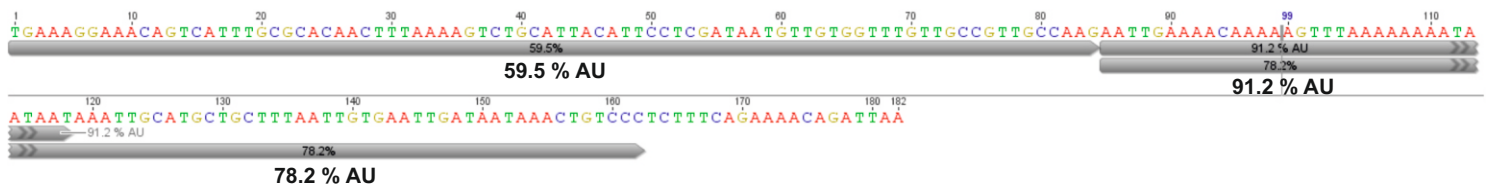

## TNF alpha ARE

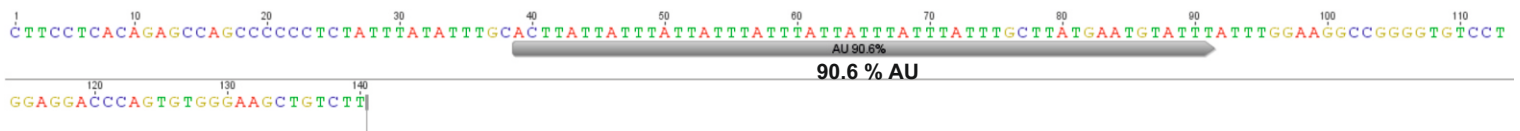

Supplement: 40064_2014_1205_MOESM1_ESM.pdf [file 40064_2014_1205_MOESM1_ESM.pdf]
